# Supplementary material
Source: PubMed Central journal article supplement (PMC3663539)
Supplement: supp_M113.457408_jbc.M113.457408-1.pdf [file supp_M113.457408_jbc.M113.457408-1.pdf]

# Supplementary Information, Tanik et al.

**Supplementary Table 1: The antibodies used in this study**

| <i>Antigen</i>        | <i>Antibody</i>      | <i>Application</i> | <i>Dilution</i> | <i>Source</i>                   |
|-----------------------|----------------------|--------------------|-----------------|---------------------------------|
| 20S Proteasome        | PW 8155              | IF                 | 1:2000          | Biomol                          |
| alpha-tubulin         | T9026                | IB                 | 1:5000          | Sigma-Aldrich                   |
| $\alpha$ -syn (human) | Syn211               | IB                 | 1:2000          | (Bruening et al, 2000)          |
| $\alpha$ -syn (mouse) | mSyn-1               | IB                 | 1:500           | (Vopicelli-Daley et al., 2011)  |
| CD-63                 | CD-63                | IF                 | 1:500           | (Abache et al, 2007)            |
| GFP                   | sc-9996              | IB                 | 1:500           | Santa Cruz                      |
| Lamp1 (human)         | H4A3                 | IF,IB              | 1:1000, 1:1000  | BD biosciences                  |
| Lamp1 (mouse)         | 1D4B                 | IF                 | 1:500           | Developmental Studies Hybridoma |
| LC3                   | PM036                | IF, IB             | 1:2000, 1:500   | MBL                             |
| myc                   | 9E10                 | IF                 | 1:2000          | DHSB                            |
| p62 (human)           | 610832               | IF, IB             | 1:2000, 1:1000  | BD Transduction                 |
| p62 (mouse)           | 2C11                 | IF, IB             | 1:1000, 1:1000  | Abnova                          |
| p- $\alpha$ -syn      | 81a                  | IF, IB             | 1:8000, 1:1000  | (Waxman & Giasson, 2008)        |
| p- $\alpha$ -syn      | p- $\alpha$ -syn 6.2 | IF                 | 1:1000          | (Luk et al, 2012)               |
| Tuj-1                 | MMS-435P             | IB                 | 1:5000          | Covance                         |
| Ubiquitin             | Ub1B4                | IB, IF             | 1:1000, 1:1000  | (Sampathu et al, 2006)          |

# Supplementary Information, Tanik et al.

**Supplementary Table 2: Quantification results that are used for statistical analyses**

| Figure | Data Set     | Mean  | SEM  | n | Figure | Data Set             | Mean  | SEM  | n | Figure | Data Set          | Mean  | SEM  | n | Figure                                                  | Data Set | Mean | SEM | n |
|--------|--------------|-------|------|---|--------|----------------------|-------|------|---|--------|-------------------|-------|------|---|---------------------------------------------------------|----------|------|-----|---|
| 2B     | PBS          | 6.3   | 4.7  | 3 | 3C     | 0h PBS               | 103.1 | 2.7  | 4 |        | TX (KO)           | 91.7  | 8.4  | 5 |                                                         | Starve   | 2.2  | 0.3 | 3 |
|        | 0h           | 18.4  | 22.3 | 3 |        | 24h PBS              | 126.6 | 12.9 | 4 |        | SDS (wt)          | 163.5 | 27.7 | 5 | 11D                                                     | Comp     | 0.7  | 0.1 | 2 |
|        | (-)          | 100.0 | N/A* | 3 |        | 48h PBS              | 73.4  | 6.0  | 4 |        | SDS (KO)          | 116.1 | 10.1 | 5 |                                                         | Rap      | 0.6  | 0.0 | 2 |
|        | 3-MA         | 91.1  | 28.1 | 3 |        | 72h PBS              | 29.9  | 3.6  | 4 | 7C     | (-) PBS           | 18.8  | 4.5  | 4 |                                                         | Starve   | 0.5  | 0.1 | 2 |
|        | Rap          | 166.5 | 33.7 | 3 |        | 0h Pff               | 114.7 | 6.0  | 4 |        | 3-MA PBS          | 83.9  | 15.8 | 4 | *SEM Not applicable (N/A) due to normalization process. |          |      |     |   |
| 2D     | (-) PBS      | 2.2   | 1.1  | 3 |        | 24h Pff              | 120.0 | 20.6 | 4 |        | Rap PBS           | 14.4  | 3.9  | 4 |                                                         |          |      |     |   |
|        | Rap PBS      | 5.3   | 0.7  | 3 |        | 48h Pff              | 125.4 | 17.1 | 4 |        | (-) Pff           | 45.8  | 6.4  | 4 |                                                         |          |      |     |   |
|        | Cq (-) PBS   | 11.6  | 4.6  | 3 |        | 72h Pff              | 111.8 | 18.5 | 4 |        | 3-MA Pff          | 100.0 | N/A* | 4 |                                                         |          |      |     |   |
|        | Cq Rap PBS   | 11.3  | 3.0  | 3 | 4B     | p62 ( $\alpha$ -syn) | 342.0 | 37.5 | 7 |        | Rap Pff           | 59.2  | 3.5  | 4 |                                                         |          |      |     |   |
|        | (-) Pff      | 100.0 | N/A* | 3 |        | p62 (naïve)          | 103.0 | 9.8  | 3 | 7E     | $\alpha$ -syn     | 295.0 | 98.4 | 4 |                                                         |          |      |     |   |
|        | Rap Pff      | 128.2 | 24.2 | 3 |        | LC3 ( $\alpha$ -syn) | 254.8 | 29.1 | 5 |        | naïve             | 82.2  | 12.1 | 4 |                                                         |          |      |     |   |
|        | Cq (-) Pff   | 87.8  | 12.4 | 3 |        | LC3 (naïve)          | 99.5  | 32.7 | 3 | 8B     | (-) PBS           | 7.9   | 2.4  | 4 |                                                         |          |      |     |   |
|        | Cq Rap Pff   | 122.3 | 21.0 | 3 | 4D     | TX ( $\alpha$ -syn)  | 126.2 | 14.6 | 8 |        | (Cq) PBS          | 137.9 | 4.4  | 4 |                                                         |          |      |     |   |
| 2F     | (-) PBS      | 12.1  | 3.7  | 3 |        | TX (naïve)           | 103.0 | 24.9 | 4 |        | (-) Pff           | 24.6  | 5.4  | 4 |                                                         |          |      |     |   |
|        | Atg4b PBS    | 10.2  | 3.7  | 3 |        | SDS ( $\alpha$ -syn) | 286.7 | 43.2 | 5 |        | (Cq) Pff          | 139.5 | 9.3  | 4 |                                                         |          |      |     |   |
|        | Cq (-) PBS   | 8.5   | 3.9  | 3 |        | SDS (naïve)          | 114.6 | 30.6 | 3 | 8D     | 0h PBS            | 100.0 | N/A* | 4 |                                                         |          |      |     |   |
|        | Cq Atg4b PBS | 17.3  | 3.6  | 3 | 5D     | 0h                   | 15.2  | 9.0  | 3 |        | 24h PBS           | 52.0  | 7.8  | 4 |                                                         |          |      |     |   |
|        | (-) Pff      | 100.0 | N/A* | 3 |        | (-)                  | 100.0 | N/A* | 3 |        | 48h PBS           | 3.6   | 5.0  | 4 |                                                         |          |      |     |   |
|        | Atg4b Pff    | 85.4  | 14.0 | 3 |        | Starve               | 129.9 | 23.8 | 3 |        | 72h PBS           | 2.7   | 1.6  | 3 |                                                         |          |      |     |   |
|        | Cq (-) Pff   | 77.3  | 11.0 | 3 |        | 3MA                  | 87.9  | 22.6 | 3 |        | 72h (-) PBS       | 2.7   | 1.2  | 3 |                                                         |          |      |     |   |
|        | Cq Atg4b Pff | 73.6  | 6.0  | 3 | 5F     | 10d-TX PBS           | 77.0  | 11.9 | 3 |        | 0h Pff            | 100.0 | N/A* | 4 |                                                         |          |      |     |   |
| 3B     | 0h-TX PBS    | 100.0 | N/A* | 4 |        | 14d-TX PBS           | 78.6  | 24.3 | 3 |        | 24h Pff           | 102.0 | 16.5 | 4 |                                                         |          |      |     |   |
|        | 24h-TX PBS   | 125.7 | 6.3  | 4 |        | 17d-TX PBS           | 52.8  | 15.8 | 3 |        | 48h Pff           | 32.5  | 2.9  | 4 |                                                         |          |      |     |   |
|        | 48h-TX PBS   | 72.6  | 2.8  | 4 |        | 10d-SDS PBS          | 0.0   | 0.0  | 3 |        | 72h Pff           | 20.2  | 3.6  | 3 |                                                         |          |      |     |   |
|        | 72h-TX PBS   | 29.0  | 1.9  | 4 |        | 14d-SDS PBS          | 0.0   | 0.0  | 3 |        | 72h (-) Pff       | 7.0   | 0.2  | 3 |                                                         |          |      |     |   |
|        | 0h-SDS PBS   | 3.1   | 2.7  | 4 |        | 17d-SDS PBS          | 0.0   | 0.0  | 3 | 9A     | (-) PBS           | 4.5   | 0.7  | 3 |                                                         |          |      |     |   |
|        | 24h-SDS PBS  | 0.9   | 0.8  | 4 |        | 10d-TX Pff           | 43.1  | 14.0 | 3 |        | (-) Pff           | 17.0  | 0.3  | 3 |                                                         |          |      |     |   |
|        | 48h-SDS PBS  | 0.8   | 0.7  | 4 |        | 14d-TX Pff           | 20.8  | 8.8  | 3 |        | LI PBS            | 14.4  | 0.5  | 3 |                                                         |          |      |     |   |
|        | 72h-SDS PBS  | 1.0   | 0.9  | 4 |        | 17d-TX Pff           | 25.5  | 6.9  | 3 |        | LI Pff            | 16.8  | 0.8  | 4 |                                                         |          |      |     |   |
|        | 0h-TX Pff    | 100.0 | N/A* | 4 |        | 10d-SDS Pff          | 47.5  | 14.0 | 3 | 11A    | PBS naïve         | 10.4  | 0.0  | 2 |                                                         |          |      |     |   |
|        | 24h-TX Pff   | 54.9  | 5.0  | 4 |        | 14d-SDS Pff          | 137.2 | 40.1 | 3 |        | Pff naïve         | 11.4  | 0.7  | 2 |                                                         |          |      |     |   |
|        | 48h-TX Pff   | 20.7  | 6.4  | 4 |        | 17d-SDS Pff          | 147.3 | 28.8 | 3 |        | PBS $\alpha$ -syn | 11.8  | 0.2  | 2 |                                                         |          |      |     |   |
|        | 72h-TX Pff   | 13.3  | 2.0  | 4 | 6B     | p62 (wt)             | 397.2 | 88.6 | 5 |        | Pff $\alpha$ -syn | 29.8  | 5.4  | 2 |                                                         |          |      |     |   |
|        | 0h-SDS Pff   | 18.8  | 3.6  | 4 |        | p62 (KO)             | 109.1 | 7.0  | 5 | 11B    | Comp              | 0.9   | 0.0  | 4 |                                                         |          |      |     |   |
|        | 24h-SDS Pff  | 75.9  | 7.8  | 4 |        | LC3 (wt)             | 210.7 | 32.3 | 4 |        | Rap               | 0.6   | 0.0  | 4 |                                                         |          |      |     |   |
|        | 48h-SDS Pff  | 109.0 | 15.6 | 4 |        | LC3 (KO)             | 107.0 | 15.2 | 3 |        | Starve            | 0.7   | 0.0  | 4 |                                                         |          |      |     |   |
|        | 72h-SDS Pff  | 129.0 | 5.5  | 4 | 6D     | TX (wt)              | 107.0 | 4.7  | 5 | 11C    | Comp              | 1.2   | 0.3  | 3 |                                                         |          |      |     |   |

# Supplementary Information, Tanik et al.

## Supplementary References

Abache T, Le Naour F, Planchon S, Harper F, Boucheix C, Rubinstein E (2007) The transferrin receptor and the tetraspanin web molecules CD9, CD81, and CD9P-1 are differentially sorted into exosomes after TPA treatment of K562 cells. *Journal of cellular biochemistry* **102**: 650-664

Bruening W, Giasson BI, Klein-Szanto AJ, Lee VMY, Trojanowski JQ, Godwin AK (2000) Synucleins are expressed in the majority of breast and ovarian carcinomas and in preneoplastic lesions of the ovary. *Cancer* **88**: 2154-2163

Fujita N, Hayashi-Nishino M, Fukumoto H, Omori H, Yamamoto A, Noda T, Yoshimori T (2008) An Atg4B mutant hampers the lipidation of LC3 paralogues and causes defects in autophagosome closure. *Molecular biology of the cell* **19**: 4651-4659

Luk KC, Kehm VM, Zhang B, O'Brien P, Trojanowski JQ, Lee VMY (2012) Intracerebral inoculation of pathological alpha-synuclein initiates a rapidly progressive neurodegenerative alpha-synucleinopathy in mice. *The Journal of experimental medicine* **209**: 975-986

Sampathu DM, Neumann M, Kwong LK, Chou TT, Micsenyi M, Truax A, Bruce J, Grossman M, Trojanowski JQ, Lee VMY (2006) Pathological heterogeneity of frontotemporal lobar degeneration with ubiquitin-positive inclusions delineated by ubiquitin immunohistochemistry and novel monoclonal antibodies. *Am J Pathol* **169**: 1343-1352

Sherer NM, Lehmann MJ, Jimenez-Soto LF, Ingmundson A, Horner SM, Cicchetti G, Allen PG, Pypaert M, Cunningham JM, Mothes W (2003) Visualization of retroviral replication in living cells reveals budding into multivesicular bodies. *Traffic* **4**: 785-801

Waxman EA, Giasson BI (2008) Specificity and regulation of casein kinase-mediated phosphorylation of alpha-synuclein. *Journal of neuropathology and experimental neurology* **67**: 402-416
